# Supplementary material
Source: PubMed Central journal article supplement (PMC6458072)
Supplement: NIHMS1522414-supplement-Change_of_author_forms.pdf [file NIHMS1522414-supplement-Change_of_author_forms.pdf]

## Change of Authorship Form

(Must be completed and signed by ALL authors)

Please check all that apply

☒ New author(s) have been added (in addition to this form, all new authors must complete the copyright transfer agreement and conflict of interest disclosure.

☐ Change in order of authorship.

☐ An author wishes to remove his/her name. An author's name may only be removed his/her own request and a letter signed by the author should accompany this form

Manuscript Number HYPE201812109R1

Manuscript Title Gut microbiota composition and blood pressure: Coronary Artery Risk Development in Young Adults (CARDIA) Study

### Former Authorship

~~Please list ALL AUTHORS in the same order as the original submission. For more than 12, use an extra sheet.~~

#### Print Name

Name (1) Shan Sun  
Name (2) Michael Sioda  
Name (3) Kathryn Winglee  
Name (4) Michael Wu  
Name (5) David R Jacobs, Jr  
Name (6) James M Shikany

#### Print Name

Name (7) Donald M Lloyd-Jones  
Name (8) Lenore J Launer  
Name (9) Anthony A Fodor  
Name (10) Katie A Meyer  
Name (11) \_\_\_\_\_  
Name (12) \_\_\_\_\_

### New Authorship

~~All authors must sign below agreeing to the changes in authorship. The authorship order must reflect the authorship order of the manuscript.~~

|                                      |                                                                                                       |                        |
|--------------------------------------|-------------------------------------------------------------------------------------------------------|------------------------|
| Name (1) <u>Shan Sun</u>             | Signature <u>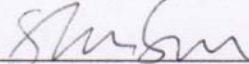</u> | Date <u>01/12/2019</u> |
| Name (2) <u>Anju Lulla</u>           | Signature _____                                                                                       | Date _____             |
| Name (3) <u>Michael Sioda</u>        | Signature _____                                                                                       | Date _____             |
| Name (4) <u>Kathryn Winglee</u>      | Signature _____                                                                                       | Date _____             |
| Name (5) <u>Michael Wu</u>           | Signature _____                                                                                       | Date _____             |
| Name (6) <u>David R Jacobs, Jr</u>   | Signature _____                                                                                       | Date _____             |
| Name (7) <u>James M Shikany</u>      | Signature _____                                                                                       | Date _____             |
| Name (8) <u>Donald M Lloyd-Jones</u> | Signature _____                                                                                       | Date _____             |
| Name (9) <u>Lenore J Launer</u>      | Signature _____                                                                                       | Date _____             |
| Name (10) <u>Anthony A Fodor</u>     | Signature _____                                                                                       | Date _____             |
| Name (11) <u>Katie A Meyer</u>       | Signature _____                                                                                       | Date _____             |
| Name (12) _____                      | Signature _____                                                                                       | Date _____             |

Please print form and fax to 214-706-1565.

## Change of Authorship Form

(Must be completed and signed by ALL authors)

Please check all that apply

☒ New author(s) have been added (in addition to this form, all new authors must complete the copyright transfer agreement and conflict of interest disclosure.

☐ Change in order of authorship.

☐ An author wishes to remove his/her name. An author's name may only be removed his/her own request and a letter signed by the author should accompany this form

Manuscript Number HYPE201812109R1

Manuscript Title Gut microbiota composition and blood pressure: Coronary Artery Risk Development in Young Adults (CARDIA) Study

### Former Authorship

Please list ALL AUTHORS in the same order as the original submission. For more than 12, use an extra sheet.

#### Print Name

Name (1) Shan Sun

Name (2) Michael Sioda

Name (3) Kathryn Winglee

Name (4) Michael Wu

Name (5) David R Jacobs, Jr

Name (6) James M Shikany

#### Print Name

Name (7) Donald M Lloyd-Jones

Name (8) Lenore J Launer

Name (9) Anthony A Fodor

Name (10) Katie A Meyer

Name (11) \_\_\_\_\_

Name (12) \_\_\_\_\_

### New Authorship

All authors must sign below agreeing to the changes in authorship. The authorship order must reflect the authorship order of the manuscript.

|                                      |                              |                        |
|--------------------------------------|------------------------------|------------------------|
| Name (1) <u>Shan Sun</u>             | Signature _____              | Date _____             |
| Name (2) <u>Anju Lulla</u>           | Signature <u>A. P. Lulla</u> | Date <u>01/18/2019</u> |
| Name (3) <u>Michael Sioda</u>        | Signature _____              | Date _____             |
| Name (4) <u>Kathryn Winglee</u>      | Signature _____              | Date _____             |
| Name (5) <u>Michael Wu</u>           | Signature _____              | Date _____             |
| Name (6) <u>David R Jacobs, Jr</u>   | Signature _____              | Date _____             |
| Name (7) <u>James M Shikany</u>      | Signature _____              | Date _____             |
| Name (8) <u>Donald M Lloyd-Jones</u> | Signature _____              | Date _____             |
| Name (9) <u>Lenore J Launer</u>      | Signature _____              | Date _____             |
| Name (10) <u>Anthony A Fodor</u>     | Signature _____              | Date _____             |
| Name (11) <u>Katie A Meyer</u>       | Signature _____              | Date _____             |
| Name (12) _____                      | Signature _____              | Date _____             |

Please print form and fax to 214-706-1565.



## Change of Authorship Form

(Must be completed and signed by ALL authors)

Please check all that apply

☒ New author(s) have been added (in addition to this form, all new authors must complete the copyright transfer agreement and conflict of interest disclosure.

☐ Change in order of authorship.

☐ An author wishes to remove his/her name. An author's name may only be removed his/her own request and a letter signed by the author should accompany this form

Manuscript Number HYPE201812109R1

Manuscript Title Gut microbiota composition and blood pressure: Coronary Artery Risk Development in Young Adults (CARDIA) Study

### Former Authorship

Please list ALL AUTHORS in the same order as the original submission. For more than 12, use an extra sheet.

#### Print Name

Name (1) Shan Sun  
Name (2) Michael Sioda  
Name (3) Kathryn Winglee  
Name (4) Michael Wu  
Name (5) David R Jacobs, Jr  
Name (6) James M Shikany

#### Print Name

Name (7) Donald M Lloyd-Jones  
Name (8) Lenore J Launer  
Name (9) Anthony A Fodor  
Name (10) Katie A Meyer  
Name (11) \_\_\_\_\_  
Name (12) \_\_\_\_\_

### New Authorship

All authors must sign below agreeing to the changes in authorship. The authorship order must reflect the authorship order of the manuscript.

|                                      |                                |                       |
|--------------------------------------|--------------------------------|-----------------------|
| Name (1) <u>Shan Sun</u>             | Signature _____                | Date _____            |
| Name (2) <u>Anju Lulla</u>           | Signature _____                | Date _____            |
| Name (3) <u>Michael Sioda</u>        | Signature <u>Michael Sioda</u> | Date <u>1-13-2019</u> |
| Name (4) <u>Kathryn Winglee</u>      | Signature _____                | Date _____            |
| Name (5) <u>Michael Wu</u>           | Signature _____                | Date _____            |
| Name (6) <u>David R Jacobs, Jr</u>   | Signature _____                | Date _____            |
| Name (7) <u>James M Shikany</u>      | Signature _____                | Date _____            |
| Name (8) <u>Donald M Lloyd-Jones</u> | Signature _____                | Date _____            |
| Name (9) <u>Lenore J Launer</u>      | Signature _____                | Date _____            |
| Name (10) <u>Anthony A Fodor</u>     | Signature _____                | Date _____            |
| Name (11) <u>Katie A Meyer</u>       | Signature _____                | Date _____            |
| Name (12) _____                      | Signature _____                | Date _____            |

Please print form and fax to 214-706-1565.

## Change of Authorship Form

(Must be completed and signed by ALL authors)

Please check all that apply

☒ New author(s) have been added (in addition to this form, all new authors must complete the copyright transfer agreement and conflict of interest disclosure.

☐ Change in order of authorship.

☐ An author wishes to remove his/her name. An author's name may only be removed his/her own request and a letter signed by the author should accompany this form

Manuscript Number HYPE201812109R1

Manuscript Title Gut microbiota composition and blood pressure: Coronary Artery Risk Development in Young Adults (CARDIA) Study

### Former Authorship

Please list ALL AUTHORS in the same order as the original submission. For more than 12, use an extra sheet.

#### Print Name

Name (1) Shan Sun  
Name (2) Michael Sioda  
Name (3) Kathryn Winglee  
Name (4) Michael Wu  
Name (5) David R Jacobs, Jr  
Name (6) James M Shikany

#### Print Name

Name (7) Donald M Lloyd-Jones  
Name (8) Lenore J Launer  
Name (9) Anthony A Fodor  
Name (10) Katie A Meyer  
Name (11) \_\_\_\_\_  
Name (12) \_\_\_\_\_

### New Authorship

All authors must sign below agreeing to the changes in authorship. The authorship order must reflect the authorship order of the manuscript.

|                                      |                                  |                     |
|--------------------------------------|----------------------------------|---------------------|
| Name (1) <u>Shan Sun</u>             | Signature _____                  | Date _____          |
| Name (2) <u>Anju Lulla</u>           | Signature _____                  | Date _____          |
| Name (3) <u>Michael Sioda</u>        | Signature _____                  | Date _____          |
| Name (4) <u>Kathryn Winglee</u>      | Signature <u>Kathryn Winglee</u> | Date <u>1/13/19</u> |
| Name (5) <u>Michael Wu</u>           | Signature _____                  | Date _____          |
| Name (6) <u>David R Jacobs, Jr</u>   | Signature _____                  | Date _____          |
| Name (7) <u>James M Shikany</u>      | Signature _____                  | Date _____          |
| Name (8) <u>Donald M Lloyd-Jones</u> | Signature _____                  | Date _____          |
| Name (9) <u>Lenore J Launer</u>      | Signature _____                  | Date _____          |
| Name (10) <u>Anthony A Fodor</u>     | Signature _____                  | Date _____          |
| Name (11) <u>Katie A Meyer</u>       | Signature _____                  | Date _____          |
| Name (12) _____                      | Signature _____                  | Date _____          |

Please print form and fax to 214-706-1565.

## Change of Authorship Form

(Must be completed and signed by ALL authors)

Please check all that apply

☒ New author(s) have been added (in addition to this form, all new authors must complete the copyright transfer agreement and conflict of interest disclosure.

☐ Change in order of authorship.

☐ An author wishes to remove his/her name. An author's name may only be removed his/her own request and a letter signed by the author should accompany this form

Manuscript Number HYPE201812109R1

Manuscript Title Gut microbiota composition and blood pressure: Coronary Artery Risk Development in Young Adults (CARDIA) Study

### Former Authorship

Please list ALL AUTHORS in the same order as the original submission. For more than 12, use an extra sheet.

#### Print Name

Name (1) Shan Sun  
Name (2) Michael Sioda  
Name (3) Kathryn Winglee  
Name (4) Michael Wu  
Name (5) David R Jacobs, Jr  
Name (6) James M Shikany

#### Print Name

Name (7) Donald M Lloyd-Jones  
Name (8) Lenore J Launer  
Name (9) Anthony A Fodor  
Name (10) Katie A Meyer  
Name (11) \_\_\_\_\_  
Name (12) \_\_\_\_\_

### New Authorship

All authors must sign below agreeing to the changes in authorship. The authorship order must reflect the authorship order of the manuscript.

|                                      |                                |                       |
|--------------------------------------|--------------------------------|-----------------------|
| Name (1) <u>Shan Sun</u>             | Signature _____                | Date _____            |
| Name (2) <u>Anju Lulla</u>           | Signature _____                | Date _____            |
| Name (3) <u>Michael Sioda</u>        | Signature _____                | Date _____            |
| Name (4) <u>Kathryn Winglee</u>      | Signature _____                | Date _____            |
| Name (5) <u>Michael Wu</u>           | Signature <u>Michael C. Wu</u> | Date <u>1/13/2019</u> |
| Name (6) <u>David R Jacobs, Jr</u>   | Signature _____                | Date _____            |
| Name (7) <u>James M Shikany</u>      | Signature _____                | Date _____            |
| Name (8) <u>Donald M Lloyd-Jones</u> | Signature _____                | Date _____            |
| Name (9) <u>Lenore J Launer</u>      | Signature _____                | Date _____            |
| Name (10) <u>Anthony A Fodor</u>     | Signature _____                | Date _____            |
| Name (11) <u>Katie A Meyer</u>       | Signature _____                | Date _____            |
| Name (12) _____                      | Signature _____                | Date _____            |

Please print form and fax to 214-706-1565.



## Change of Authorship Form

(Must be completed and signed by ALL authors)

Please check all that apply

☒ New author(s) have been added (in addition to this form, all new authors must complete the copyright transfer agreement and conflict of interest disclosure.

☐ Change in order of authorship.

☐ An author wishes to remove his/her name. An author's name may only be removed his/her own request and a letter signed by the author should accompany this form

Manuscript Number HYPE201812109R1

Manuscript Title Gut microbiota composition and blood pressure: Coronary Artery Risk Development in Young Adults (CARDIA) Study

### Former Authorship

Please list ALL AUTHORS in the same order as the original submission. For more than 12, use an extra sheet.

#### Print Name

Name (1) Shan Sun  
Name (2) Michael Sioda  
Name (3) Kathryn Winglee  
Name (4) Michael Wu  
Name (5) David R Jacobs, Jr  
Name (6) James M Shikany

#### Print Name

Name (7) Donald M Lloyd-Jones  
Name (8) Lenore J Launer  
Name (9) Anthony A Fodor  
Name (10) Katie A Meyer  
Name (11) \_\_\_\_\_  
Name (12) \_\_\_\_\_

### New Authorship

All authors must sign below agreeing to the changes in authorship. The authorship order must reflect the authorship order of the manuscript.

|                                      |                                                                                                |                       |
|--------------------------------------|------------------------------------------------------------------------------------------------|-----------------------|
| Name (1) <u>Shan Sun</u>             | Signature _____                                                                                | Date _____            |
| Name (2) <u>Anju Lulla</u>           | Signature _____                                                                                | Date _____            |
| Name (3) <u>Michael Sioda</u>        | Signature _____                                                                                | Date _____            |
| Name (4) <u>Kathryn Winglee</u>      | Signature _____                                                                                | Date _____            |
| Name (5) <u>Michael Wu</u>           | Signature _____                                                                                | Date _____            |
| Name (6) <u>David R Jacobs, Jr</u>   | Signature 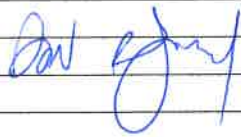 | Date <u>1/17/2019</u> |
| Name (7) <u>James M Shikany</u>      | Signature _____                                                                                | Date _____            |
| Name (8) <u>Donald M Lloyd-Jones</u> | Signature _____                                                                                | Date _____            |
| Name (9) <u>Lenore J Launer</u>      | Signature _____                                                                                | Date _____            |
| Name (10) <u>Anthony A Fodor</u>     | Signature _____                                                                                | Date _____            |
| Name (11) <u>Katie A Meyer</u>       | Signature _____                                                                                | Date _____            |
| Name (12) _____                      | Signature _____                                                                                | Date _____            |

Please print form and fax to 214-706-1565.

## Change of Authorship Form

(Must be completed and signed by ALL authors)

Please check all that apply

☒ New author(s) have been added (in addition to this form, all new authors must complete the copyright transfer agreement and conflict of interest disclosure.

☐ Change in order of authorship.

☐ An author wishes to remove his/her name. An author's name may only be removed his/her own request and a letter signed by the author should accompany this form

Manuscript Number HYPE201812109R1

Manuscript Title Gut microbiota composition and blood pressure: Coronary Artery Risk Development in Young Adults (CARDIA) Study

### Former Authorship

Please list ALL AUTHORS in the same order as the original submission. For more than 12, use an extra sheet.

#### Print Name

Name (1) Shan Sun  
Name (2) Michael Sioda  
Name (3) Kathryn Winglee  
Name (4) Michael Wu  
Name (5) David R Jacobs, Jr  
Name (6) James M Shikany

#### Print Name

Name (7) Donald M Lloyd-Jones  
Name (8) Lenore J Launer  
Name (9) Anthony A Fodor  
Name (10) Katie A Meyer  
Name (11) \_\_\_\_\_  
Name (12) \_\_\_\_\_

### New Authorship

All authors must sign below agreeing to the changes in authorship. The authorship order must reflect the authorship order of the manuscript.

|                                      |                                                                                                       |                      |
|--------------------------------------|-------------------------------------------------------------------------------------------------------|----------------------|
| Name (1) <u>Shan Sun</u>             | Signature _____                                                                                       | Date _____           |
| Name (2) <u>Anju Lulla</u>           | Signature _____                                                                                       | Date _____           |
| Name (3) <u>Michael Sioda</u>        | Signature _____                                                                                       | Date _____           |
| Name (4) <u>Kathryn Winglee</u>      | Signature _____                                                                                       | Date _____           |
| Name (5) <u>Michael Wu</u>           | Signature _____                                                                                       | Date _____           |
| Name (6) <u>David R Jacobs, Jr</u>   | Signature _____                                                                                       | Date _____           |
| Name (7) <u>James M Shikany</u>      | Signature <u></u> | Date <u>01/14/19</u> |
| Name (8) <u>Donald M Lloyd-Jones</u> | Signature _____                                                                                       | Date _____           |
| Name (9) <u>Lenore J Launer</u>      | Signature _____                                                                                       | Date _____           |
| Name (10) <u>Anthony A Fodor</u>     | Signature _____                                                                                       | Date _____           |
| Name (11) <u>Katie A Meyer</u>       | Signature _____                                                                                       | Date _____           |
| Name (12) _____                      | Signature _____                                                                                       | Date _____           |

Please print form and fax to 214-706-1565.

## Change of Authorship Form

(Must be completed and signed by ALL authors)

Please check all that apply

☒ New author(s) have been added (in addition to this form, all new authors must complete the copyright transfer agreement and conflict of interest disclosure.

☐ Change in order of authorship.

☐ An author wishes to remove his/her name. An author's name may only be removed his/her own request and a letter signed by the author should accompany this form

Manuscript Number HYPE201812109R1

Manuscript Title Gut microbiota composition and blood pressure: Coronary Artery Risk Development in Young Adults (CARDIA) Study

### Former Authorship

Please list ALL AUTHORS in the same order as the original submission. For more than 12, use an extra sheet.

#### Print Name

Name (1) Shan Sun  
Name (2) Michael Sioda  
Name (3) Kathryn Winglee  
Name (4) Michael Wu  
Name (5) David R Jacobs, Jr  
Name (6) James M Shikany

#### Print Name

Name (7) Donald M Lloyd-Jones  
Name (8) Lenore J Launer  
Name (9) Anthony A Fodor  
Name (10) Katie A Meyer  
Name (11) \_\_\_\_\_  
Name (12) \_\_\_\_\_

### New Authorship

All authors must sign below agreeing to the changes in authorship. The authorship order must reflect the authorship order of the manuscript.

|                                      |                                                                                                       |                     |
|--------------------------------------|-------------------------------------------------------------------------------------------------------|---------------------|
| Name (1) <u>Shan Sun</u>             | Signature _____                                                                                       | Date _____          |
| Name (2) <u>Anju Lulla</u>           | Signature _____                                                                                       | Date _____          |
| Name (3) <u>Michael Sioda</u>        | Signature _____                                                                                       | Date _____          |
| Name (4) <u>Kathryn Winglee</u>      | Signature _____                                                                                       | Date _____          |
| Name (5) <u>Michael Wu</u>           | Signature _____                                                                                       | Date _____          |
| Name (6) <u>David R Jacobs, Jr</u>   | Signature _____                                                                                       | Date _____          |
| Name (7) <u>James M Shikany</u>      | Signature _____                                                                                       | Date _____          |
| Name (8) <u>Donald M Lloyd-Jones</u> | Signature <u></u> | Date <u>1/24/19</u> |
| Name (9) <u>Lenore J Launer</u>      | Signature _____                                                                                       | Date _____          |
| Name (10) <u>Anthony A Fodor</u>     | Signature _____                                                                                       | Date _____          |
| Name (11) <u>Katie A Meyer</u>       | Signature _____                                                                                       | Date _____          |
| Name (12) _____                      | Signature _____                                                                                       | Date _____          |

Please print form and fax to 214-706-1565.



## Change of Authorship Form

(Must be completed and signed by ALL authors)

Please check all that apply

☒ New author(s) have been added (in addition to this form, all new authors must complete the copyright transfer agreement and conflict of interest disclosure.

☐ Change in order of authorship.

☐ An author wishes to remove his/her name. An author's name may only be removed his/her own request and a letter signed by the author should accompany this form

Manuscript Number HYPE201812109R1

Manuscript Title Gut microbiota composition and blood pressure: Coronary Artery Risk Development in Young Adults (CARDIA) Study

### Former Authorship

Please list ALL AUTHORS in the same order as the original submission. For more than 12, use an extra sheet.

#### Print Name

Name (1) Shan Sun  
Name (2) Michael Sioda  
Name (3) Kathryn Winglee  
Name (4) Michael Wu  
Name (5) David R Jacobs, Jr  
Name (6) James M Shikany

#### Print Name

Name (7) Donald M Lloyd-Jones  
Name (8) Lenore J Launer *Lenore J Launer*  
Name (9) Anthony A Fodor  
Name (10) Katie A Meyer  
Name (11) \_\_\_\_\_  
Name (12) \_\_\_\_\_

### New Authorship

All authors must sign below agreeing to the changes in authorship. The authorship order must reflect the authorship order of the manuscript.

|                                      |                                  |                    |
|--------------------------------------|----------------------------------|--------------------|
| Name (1) <u>Shan Sun</u>             | Signature _____                  | Date _____         |
| Name (2) <u>Anju Lulla</u>           | Signature _____                  | Date _____         |
| Name (3) <u>Michael Sioda</u>        | Signature _____                  | Date _____         |
| Name (4) <u>Kathryn Winglee</u>      | Signature _____                  | Date _____         |
| Name (5) <u>Michael Wu</u>           | Signature _____                  | Date _____         |
| Name (6) <u>David R Jacobs, Jr</u>   | Signature _____                  | Date _____         |
| Name (7) <u>James M Shikany</u>      | Signature _____                  | Date _____         |
| Name (8) <u>Donald M Lloyd-Jones</u> | Signature _____                  | Date _____         |
| Name (9) <u>Lenore J Launer</u>      | Signature <i>Lenore J Launer</i> | Date <u>1/9/19</u> |
| Name (10) <u>Anthony A Fodor</u>     | Signature _____                  | Date _____         |
| Name (11) <u>Katie A Meyer</u>       | Signature _____                  | Date _____         |
| Name (12) _____                      | Signature _____                  | Date _____         |

Please print form and fax to 214-706-1565.

## Change of Authorship Form

(Must be completed and signed by ALL authors)

Please check all that apply

☒ New author(s) have been added (in addition to this form, all new authors must complete the copyright transfer agreement and conflict of interest disclosure.

☐ Change in order of authorship.

☐ An author wishes to remove his/her name. An author's name may only be removed his/her own request and a letter signed by the author should accompany this form

Manuscript Number HYPE201812109R1

Manuscript Title Gut microbiota composition and blood pressure: Coronary Artery Risk Development in Young Adults (CARDIA) Study

### Former Authorship

Please list ALL AUTHORS in the same order as the original submission. For more than 12, use an extra sheet.

#### Print Name

Name (1) Shan Sun  
Name (2) Michael Sioda  
Name (3) Kathryn Winglee  
Name (4) Michael Wu  
Name (5) David R Jacobs, Jr  
Name (6) James M Shikany

#### Print Name

Name (7) Donald M Lloyd-Jones  
Name (8) Lenore J Launer  
Name (9) Anthony A Fodor  
Name (10) Katie A Meyer  
Name (11) \_\_\_\_\_  
Name (12) \_\_\_\_\_

### New Authorship

All authors must sign below agreeing to the changes in authorship. The authorship order must reflect the authorship order of the manuscript.

|                                      |                              |                       |
|--------------------------------------|------------------------------|-----------------------|
| Name (1) <u>Shan Sun</u>             | Signature _____              | Date _____            |
| Name (2) <u>Anju Lulla</u>           | Signature _____              | Date _____            |
| Name (3) <u>Michael Sioda</u>        | Signature _____              | Date _____            |
| Name (4) <u>Kathryn Winglee</u>      | Signature _____              | Date _____            |
| Name (5) <u>Michael Wu</u>           | Signature _____              | Date _____            |
| Name (6) <u>David R Jacobs, Jr</u>   | Signature _____              | Date _____            |
| Name (7) <u>James M Shikany</u>      | Signature _____              | Date _____            |
| Name (8) <u>Donald M Lloyd-Jones</u> | Signature _____              | Date _____            |
| Name (9) <u>Lenore J Launer</u>      | Signature _____              | Date _____            |
| Name (10) <u>Anthony A Fodor</u>     | Signature <u>[Signature]</u> | Date <u>1/14/2019</u> |
| Name (11) <u>Katie A Meyer</u>       | Signature _____              | Date _____            |
| Name (12) _____                      | Signature _____              | Date _____            |

Please print form and fax to 214-706-1565.

## Change of Authorship Form

(Must be completed and signed by ALL authors)

Please check all that apply

☒ New author(s) have been added (in addition to this form, all new authors must complete the copyright transfer agreement and conflict of interest disclosure.

☐ Change in order of authorship.

☐ An author wishes to remove his/her name. An author's name may only be removed his/her own request and a letter signed by the author should accompany this form

Manuscript Number HYPE201812109R1

Manuscript Title Gut microbiota composition and blood pressure: Coronary Artery Risk Development in Young Adults (CARDIA) Study

### Former Authorship

Please list ALL AUTHORS in the same order as the original submission. For more than 12, use an extra sheet.

#### Print Name

Name (1) Shan Sun  
Name (2) Michael Sioda  
Name (3) Kathryn Winglee  
Name (4) Michael Wu  
Name (5) David R Jacobs, Jr  
Name (6) James M Shikany

#### Print Name

Name (7) Donald M Lloyd-Jones  
Name (8) Lenore J Launer  
Name (9) Anthony A Fodor  
Name (10) Katie A Meyer  
Name (11) \_\_\_\_\_  
Name (12) \_\_\_\_\_

### New Authorship

All authors must sign below agreeing to the changes in authorship. The authorship order must reflect the authorship order of the manuscript.

|                                      |                                                                                                |                        |
|--------------------------------------|------------------------------------------------------------------------------------------------|------------------------|
| Name (1) <u>Shan Sun</u>             | Signature _____                                                                                | Date _____             |
| Name (2) <u>Anju Lulla</u>           | Signature _____                                                                                | Date _____             |
| Name (3) <u>Michael Sioda</u>        | Signature _____                                                                                | Date _____             |
| Name (4) <u>Kathryn Winglee</u>      | Signature _____                                                                                | Date _____             |
| Name (5) <u>Michael Wu</u>           | Signature _____                                                                                | Date _____             |
| Name (6) <u>David R Jacobs, Jr</u>   | Signature _____                                                                                | Date _____             |
| Name (7) <u>James M Shikany</u>      | Signature _____                                                                                | Date _____             |
| Name (8) <u>Donald M Lloyd-Jones</u> | Signature _____                                                                                | Date _____             |
| Name (9) <u>Lenore J Launer</u>      | Signature _____                                                                                | Date _____             |
| Name (10) <u>Anthony A Fodor</u>     | Signature _____                                                                                | Date _____             |
| Name (11) <u>Katie A Meyer</u>       | Signature  | Date <u>01/26/2019</u> |
| Name (12) _____                      | Signature _____                                                                                | Date _____             |

Please print form and fax to 214-706-1565.
